# Supplementary material
Source: PubMed Central journal article supplement (PMC8702451)

# Supplemental Figure 1. Monocyte and Lymphocyte Counts in Patients with GATA 2 Deficiency

(I) HRD who Received PT/Cy for GVHD Prophylaxis

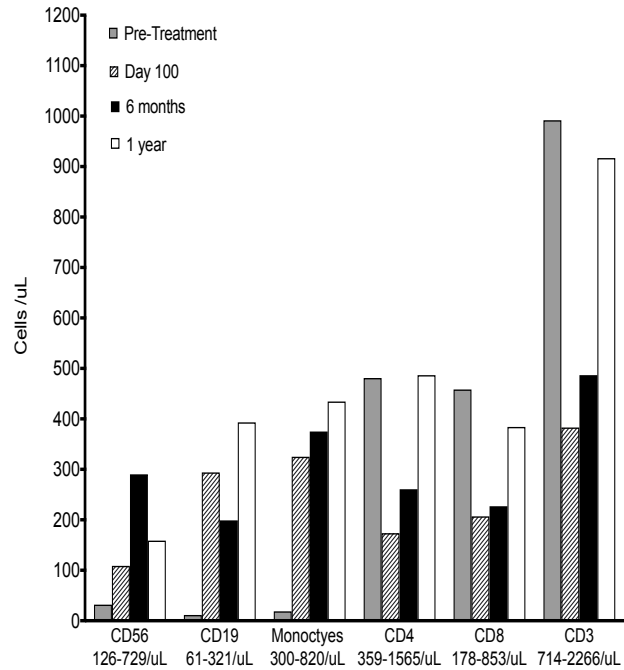

(II) MRD/URD who Received Post-transplant Cytoxin (PT/Cy) for GVHD Prophylaxis

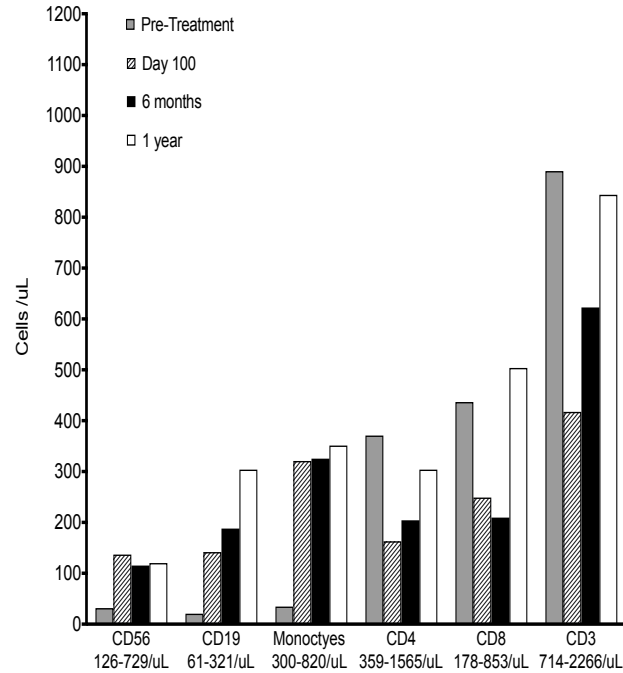

(III) MRD/URD who Received Tacro/MTX for GVHD Prophylaxis

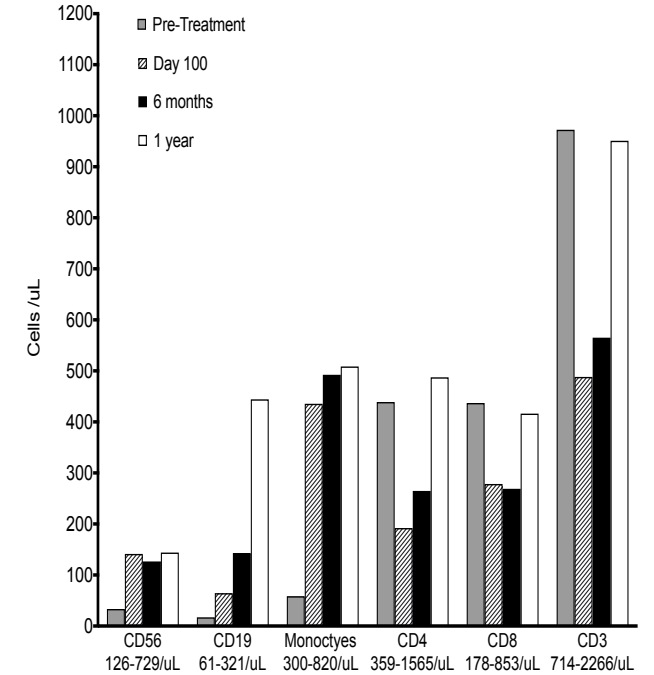

Supplement: NIHMS1738511-supplement-fS1.pdf [file NIHMS1738511-supplement-fS1.pdf]
